# Supplementary material
Source: PubMed Central journal article supplement (PMC3298447)
Supplement: NIHMS356837-supplement-1_si_001.pdf [file NIHMS356837-supplement-1_si_001.pdf]

Supporting Information:

### Time domain characterization method

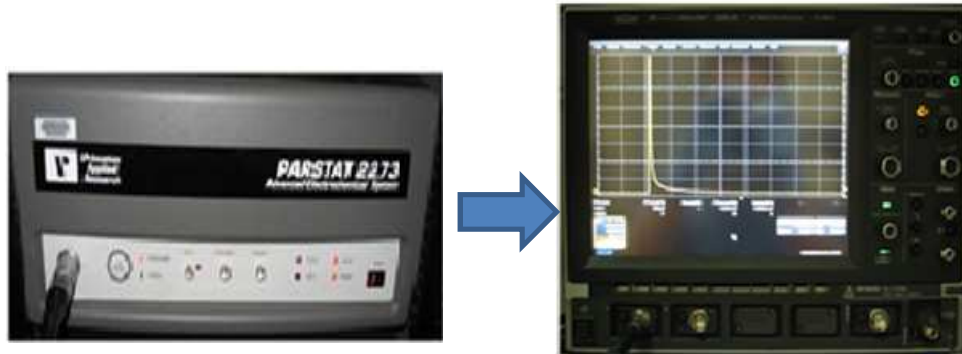

The measurement was done by using a potentiostat (PARSTAT 2273, Princeton Applied Research) controlled by a computer using a PowerSuite electrochemical software and its analog signal output was connected to a high sample rate oscilloscope to enhance the resolution at very short time ( $< 1 \mu\text{s}$ ).

### Charge and capacitance responses under step voltage for the RC circuit in figure 1(b)

The charge response under a step voltage can be obtained by integrating eq. (1)

$$\text{Charge Density (t)} = (VC_D/2S)(1 - \exp(-t/\tau_{DL}))$$

where  $t$  is time. The capacitance  $C$  in unit area is Charge Density/ $V$  which is

$$C = (C_D/2S)(1 - \exp(-t/\tau_{DL}))$$

where  $S$  is the surface area and  $\tau_{DL}$  depends on gap distance  $d$ . At  $t = \tau_{DL}$ ,  $C = 0.316 C_D/S$ . As shown in figure 4 and figure 7,  $C$  at  $t = \tau_{DL}$  does not depend on thickness  $d$ , indicating that  $C_D$  is thickness independent for the thickness  $d$  studied.

## Differential capacitance as a function of time

The differential capacitance  $\Delta(Q)/\Delta(V)$  was calculated by fixing  $\Delta(V) = 1$  V, and plot  $Q(1\text{ V})/1\text{ V}$ ,  $(Q(2\text{ V})-Q(1\text{ V}))/1\text{ V}$ , and  $(Q(3\text{ V})-Q(2\text{ V}))/1\text{ V}$  vs. time .

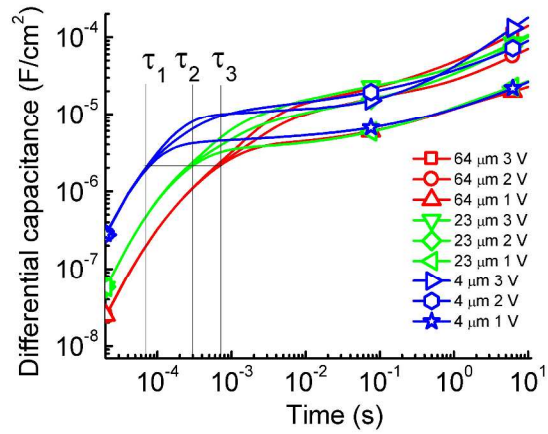

Figure 1. The differential capacitance as a function of time for the ionic liquid [C<sub>4</sub>mim][PF<sub>6</sub>] under 1 V , 2 V and 3 V at the membrane thickness of  $d = 4\ \mu\text{m}$ ,  $23\ \mu\text{m}$ , and  $64\ \mu\text{m}$ .  $\tau_1$ ,  $\tau_2$ , and  $\tau_3$  are  $\tau_{\text{DL}}$  for 4, 23, 64  $\mu\text{m}$  thick ionic systems. The error bar is indicated by the size of the symbols in the figure.

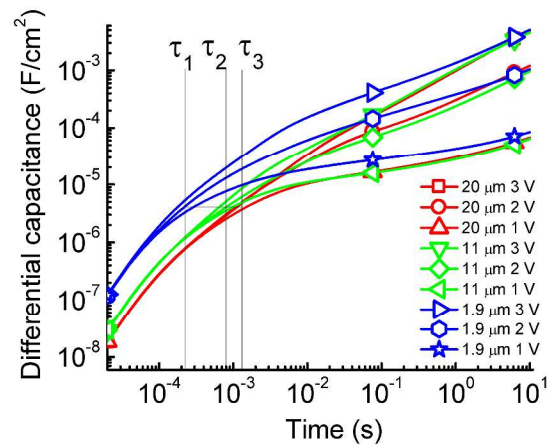

Figure 2. The differential capacitance as a function of time for the Aquivion film with 40 wt% uptake of [C<sub>2</sub>mim][TfO] under 1 V , 2 V and 3 V at the membrane thickness of  $d = 1.9 \mu\text{m}$ ,  $11 \mu\text{m}$ , and  $20 \mu\text{m}$ .  $\tau_1$ ,  $\tau_2$ , and  $\tau_3$  are  $\tau_{DL}$  for membranes of 1.9, 11, and 20  $\mu\text{m}$ . The error bar is indicated by the size of the symbols in the figure.
